# Supplementary material
Source: publisher figshare collection journal article supplement (https://karger.figshare.com/ndownloader/files/38267664)
Supplement: Supplementary file 1 [file 38267664]

**Supplementary file S2.** **The search string with the search terminology**

**AIM:** Therapeutic effects of transcutaneous electrical nerve stimulation on chronic pelvic pain in women

**Population:** Women with chronic pelvic pain

**Intervention:** All types of transcutaneous electrical nerve stimulation

**Comparison:** No treatment, placebo, any other types of electrical modulations

**Outcome**: Pain relief, improvement in quality of life

**Studies**: Randomized controlled trials

**Filter:** Timeframe from 2000’s to present, humans

**Languages:** English

**Databases**: PubMed, Science Direct, Embase, Cochrane, and Scopus

| Any other types of electrical modulations | TENS | Patients | Pain relief |
| --- | --- | --- | --- |
| Electric stimulation  Electrical current | - Transcutaneous electrical nerve stimulation - TENS | Interstitial cystitis  Endometriosis  Dysmenorrhea   - Chronic pelvic pain - Pelvic tenderness - Pelvic adhesion | - Painful bladder syndrome |

| PubMed | | | |
| --- | --- | --- | --- |
| Electric stimulation (MeSH)  Electrical current | - Transcutaneous electrical nerve stimulation - TENS | Interstitial cystitis (MeSH)  Endometriosis (MeSH)  Dysmenorrhea (MeSH)   - Chronic pelvic pain - Pelvic tenderness - Pelvic adhesion | - Painful bladder syndrome (MeSH) |

| Science Direct | | | |  |
| --- | --- | --- | --- | --- |
| Electric stimulation  Electrical current | - Transcutaneous electrical nerve stimulation | Interstitial cystitis  Endometriosis  Dysmenorrhea   - Chronic pelvic pain - Pelvic tenderness | - Painful bladder syndrome | - Clinical trials |

| Embase | | | |
| --- | --- | --- | --- |
| Electric stimulation  Electrical current | - Transcutaneous electrical nerve stimulation - TENS | Interstitial cystitis  Endometriosis  Dysmenorrhea   - Chronic pelvic pain - Pelvic tenderness - Pelvic adhesion | - Painful bladder syndrome |

| Cochrane | | | |  |
| --- | --- | --- | --- | --- |
| Electric stimulation  Electrical current | - Transcutaneous electrical nerve stimulation - TENS | Interstitial cystitis  Endometriosis  Dysmenorrhea   - Chronic pelvic pain - Pelvic tenderness - Pelvic adhesion | - Painful bladder syndrome | - Clinical trials |

| Scopus | | | |
| --- | --- | --- | --- |
| Electric stimulation  Electrical current | - Transcutaneous electrical nerve stimulation - TENS | Interstitial cystitis  Endometriosis  Dysmenorrhea   - Chronic pelvic pain - Pelvic tenderness - Pelvic adhesion | - Painful bladder syndrome |
